# Supplementary material for: SUMOylation of HNF4α regulates protein stability and hepatocyte function
Source: PubMed Central journal article supplement — J Cell Sci. 2012 Aug 1;125(15):3630–5. doi: 10.1242/jcs.102889 (PMC3445325; doi:10.1242/jcs.102889), 2012-08-01
Supplement: supp_125.15.3630_JCS102889.pdf [file supp_125.15.3630_JCS102889.pdf]

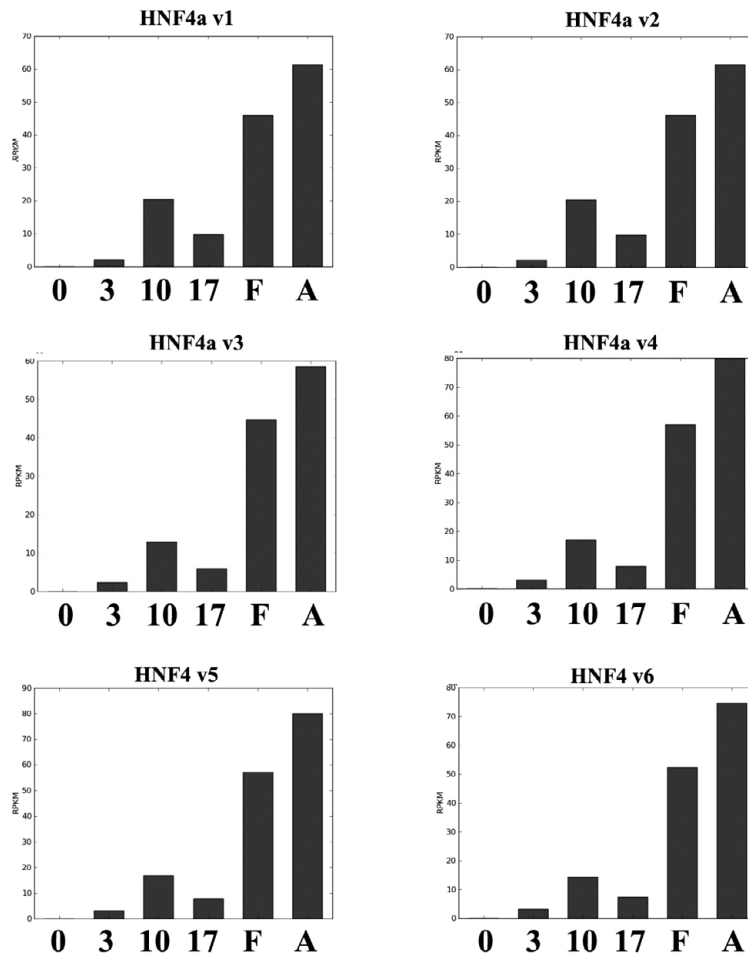

**Fig. S1. Expression profiles of HNF4<sub>α</sub> variants during hepatocellular differentiation.** HNF4<sub>α</sub> splice variants were measured at different time points throughout cellular differentiation and compared to fetal and adult liver. HNF4<sub>α</sub> mRNA levels peaked at hepatic specification and decreased as the cells matured. In all time points tested HNF4<sub>α</sub> levels for all variants were expressed at levels significantly lower than that observed in fetal and adult hepatocytes.

**Table S1. Various antibodies, the optimal concentrations, the species in which they were raised and the commercial supplier**

| Primary antibodies |             |                      |          |
|--------------------|-------------|----------------------|----------|
| Antigen*           | Type        | Supplier             | Dilution |
| Albumin            | Mouse Mono  | Sigma Aldrich        | 1/500    |
| β-Actin            | Mouse Mono  | Sigma Aldrich        | 1/15,000 |
| HNF4 <sub>α</sub>  | Rabbit Poly | Santa Cruz           | 1/200    |
| SUMO 1             | Sheep Poly  | University of Dundee | 1/1000   |
| SUMO 2             | Sheep Poly  | University of Dundee | 1/500    |
| SENP 7             | Sheep Poly  | University of Dundee | 1/2000   |
| Ubiquitin          | Sheep Poly  | University of Dundee | 1/500    |

**Table S1. Details of antibodies used in this study.**
